# Supplementary material for: Antibiotic Resistance Patterns of Pseudomonas spp. Isolated From Raw Milk Revealed by Whole Genome Sequencing
Source: Front Microbiol. 2020 Jun 3;11:1005. doi: 10.3389/fmicb.2020.01005 (PMC7326020; doi:10.3389/fmicb.2020.01005)
Supplement: Supplementary file 1 [file Table_1.XLSX]

## Sheet: Sheet1
Supplementary Table S1: All the MIC values of 86 isolates for tested antibiotics. Resistant is marked in red color.
Isolate	Identification	Aztreonam	Chloramphenicol	Ciprofloxacin	Levofloxacin	Gentamicin	Imipenem	Meropenem	Tetracycline	Trimethoprim-sulfamethoxazole	Polymyxin B	Ampicillin	Penicillin	Cefoxitin	Ceftiofur	Clindamycin
8-2	Pseudomonas fluorescens	32	32	≤0.125	≤0.125	2	256	16	1	2/38	1	>256	>256	>256	>256	>256
9-3	Pseudomonas fragi	16	4	≤0.125	0.25	0.5	8	≤0.125	0.5	2/38	1	128	8	>256	4	>256
9-4	Pseudomonas cedrina	32	32	≤0.125	1	0.5	>256	8	1	2/38	16	>256	>256	>256	32	>256
10-3	Pseudomonas fluorescens	32	32	≤0.125	0.25	4	256	4	1	8/152	1	>256	256	>256	64	>256
11-2	Pseudomonas lurida	64	32	≤0.125	0.25	2	256	4	1	8/152	1	>256	>256	>256	128	>256
13-3	Pseudomonas putida	32	32	≤0.125	≤0.125	1	128	8	1	2/38	0.5	>256	>256	>256	64	>256
18-4	Pseudomonas gessardii	32	32	≤0.125	0.25	2	>256	8	1	4/76	1	>256	>256	>256	64	>256
19-2	Pseudomonas fluorescens	64	16	0.25	1	2	256	8	2	4/76	>256	>256	>256	256	64	>256
22-4	Pseudomonas fluorescens	32	32	≤0.125	≤0.125	1	256	16	1	4/76	0.5	>256	>256	>256	64	>256
39-1	Pseudomonas fragi	8	4	≤0.125	0.25	0.5	32	≤0.125	0.5	2/38	1	128	>256	>256	4	>256
43-3	Pseudomonas brenneri	32	32	≤0.125	0.25	2	64	4	1	4/76	0.5	>256	>256	>256	64	>256
57-2	Pseudomonas fluorescens	16	8	≤0.125	0.25	1	64	≤0.125	2	2/38	1	64	>256	256	8	>256
59-3	Pseudomonas fragi	16	16	≤0.125	0.5	0.5	32	≤0.125	1	4/76	1	128	>256	256	8	>256
62-2	Pseudomonas azotoformans	32	32	≤0.125	0.5	1	8	1	2	4/76	1	128	>256	>256	64	>256
65-1	Pseudomonas gessardii	64	16	≤0.125	0.25	1	256	8	≤0.125	2/38	0.5	>256	>256	>256	128	>256
68-1	Pseudomonas fluorescens	64	32	≤0.125	≤0.125	>256	32	16	32	8/152	>256	>256	>256	>256	32	>256
70-3	Pseudomonas fragi	8	8	≤0.125	0.25	1	32	≤0.125	2	4/76	1	64	>256	>256	8	>256
72-5	Pseudomonas poae	8	4	≤0.125	0.25	0.5	32	≤0.125	0.5	4/76	2	128	>256	>256	8	>256
73-1	Pseudomonas fragi	16	8	≤0.125	0.25	1	32	≤0.125	≤0.125	2/38	4	128	>256	>256	8	>256
73-2	Pseudomonas fluorescens	8	8	≤0.125	0.25	1	32	≤0.125	≤0.125	4/76	2	64	>256	>256	8	>256
74-4	Pseudomonas fragi	16	8	≤0.125	0.25	1	64	≤0.125	0.5	4/76	1	128	>256	>256	8	>256
75-3	Pseudomonas fragi	64	16	≤0.125	≤0.125	1	256	32	1	4/76	0.5	>256	>256	>256	128	256
77-1	Pseudomonas fluorescens	8	4	≤0.125	0.25	0.5	32	≤0.125	≤0.125	4/76	1	64	>256	256	8	>256
78-2	Pseudomonas putida	8	8	≤0.125	0.25	0.5	32	≤0.125	1	2/38	2	64	>256	256	4	>256
79-2	Pseudomonas psychrophila	8	8	≤0.125	0.25	0.5	32	≤0.125	1	2/38	2	64	>256	>256	8	>256
80-2	Pseudomonas azotoformans	32	16	0.5	2	1	32	0.5	8	4/76	1	256	>256	>256	16	>256
81-1	Pseudomonas psychrophila	16	32	≤0.125	0.5	4	32	≤0.125	4	4/76	4	128	>256	>256	16	>256
84-3	Pseudomonas fragi	32	8	≤0.125	≤0.125	1	>256	16	0.25	4/76	1	>256	>256	>256	128	256
84-7	Pseudomonas fluorescens	64	16	≤0.125	≤0.125	2	64	4	0.5	4/76	2	>256	>256	>256	128	>256
86-4	Pseudomonas fluorescens	32	8	≤0.125	0.25	1	32	4	1	4/76	1	128	>256	>256	8	>256
87-1	Pseudomonas fluorescens	64	32	≤0.125	≤0.125	1	256	32	0.5	4/76	0.5	>256	>256	>256	128	>256
87-2	Pseudomonas fragi	8	8	≤0.125	0.25	1	32	≤0.125	1	4/76	2	128	>256	>256	8	>256
88-1	Pseudomonas fluorescens	64	64	≤0.125	1	2	256	8	4	4/76	16	>256	>256	>256	64	>256
90-3	Pseudomonas psychrophila	32	32	≤0.125	0.25	2	256	16	1	4/76	0.5	>256	>256	>256	64	>256
91-2	Pseudomonas fluorescens	64	32	≤0.125	0.25	1	128	4	1	4/76	0.5	>256	>256	>256	64	128
93-4	Pseudomonas fragi	64	32	≤0.125	0.25	2	256	32	1	4/76	0.5	>256	>256	>256	64	256
95-1	Pseudomonas fragi	16	4	≤0.125	0.25	0.5	32	≤0.125	0.5	4/76	1	64	>256	256	4	>256
97-1	Pseudomonas fragi	16	8	≤0.125	0.25	1	32	≤0.125	1	4/76	2	64	>256	>256	8	>256
97-2	Pseudomonas fragi	32	16	≤0.125	0.25	1	32	4	1	4/76	2	>256	>256	>256	64	>256
99-2	Pseudomonas fluorescens	128	16	≤0.125	0.25	1	256	4	1	2/38	32	>256	>256	>256	64	>256
99-4	Pseudomonas fluorescens	32	16	≤0.125	0.25	1	>256	16	1	2/38	0.5	>256	>256	>256	128	>256
103-1	Pseudomonas fluorescens	64	>256	4	8	4	256	32	64	4/76	0.5	>256	>256	>256	128	>256
103-3	Pseudomonas gessardii	128	>256	4	4	4	128	32	32	4/76	0.5	>256	>256	>256	128	>256
106-3	Pseudomonas fluorescens	32	32	≤0.125	≤0.125	2	128	2	1	8/152	32	>256	256	>256	64	>256
108-3	Pseudomonas fragi	8	4	≤0.125	0.25	1	64	≤0.125	1	4/76	1	64	>256	>256	8	256
109-1	Pseudomonas lundensis	32	16	≤0.125	≤0.125	2	256	16	4	1/19	128	>256	>256	>256	128	256
109-3	Pseudomonas fluorescens	8	8	≤0.125	0.25	1	32	≤0.125	1	2/38	2	64	>256	>256	8	>256
112-5	Pseudomonas fragi	64	32	≤0.125	0.25	2	256	8	1	4/76	1	>256	>256	>256	128	>256
114-2	Pseudomonas fluorescens	16	128	0.5	2	16	32	≤0.125	128	4/76	1	64	>256	>256	8	>256
117-1	Pseudomonas fragi	8	8	≤0.125	0.25	1	32	≤0.125	0.5	4/76	1	64	>256	256	4	256
118-3	Pseudomonas fluorescens	16	32	≤0.125	0.25	4	256	16	2	4/76	0.5	>256	>256	>256	64	>256
120-1	Pseudomonas psychrophila	64	16	≤0.125	0.25	2	256	8	1	2/38	0.5	>256	>256	>256	128	16
120-4	Pseudomonas fragi	16	8	≤0.125	0.25	1	32	≤0.125	1	4/76	1	64	>256	>256	8	>256
127-2	Pseudomonas fragi	16	8	≤0.125	0.25	1	32	≤0.125	1	4/76	2	64	>256	>256	4	>256
127-3	Pseudomonas fluorescens	64	32	2	4	4	>256	32	2	4/76	1	>256	>256	>256	128	>256
129-3	Pseudomonas fluorescens	64	32	≤0.125	0.25	1	256	16	1	2/38	0.5	>256	>256	>256	64	256
131-1	Pseudomonas psychrophila	128	16	≤0.125	0.25	2	256	16	1	2/38	1	>256	>256	>256	256	128
136-3	Pseudomonas fragi	8	8	≤0.125	≤0.125	1	32	0.25	0.5	2/38	1	128	>256	128	8	>256
137-1	Pseudomonas poae	128	64	≤0.125	0.25	8	128	2	1	16/304	2	>256	8	>256	8	>256
137-2	Pseudomonas psychrophila	64	32	≤0.125	0.25	2	256	8	1	8/152	1	>256	>256	>256	64	>256
139-4	Pseudomonas gessardii	64	16	≤0.125	0.25	1	>256	8	1	4/76	32	>256	>256	>256	64	>256
141-6	Pseudomonas fluorescens	32	32	1	2	2	>256	32	0.5	4/76	1	>256	>256	>256	128	>256
143-2	Pseudomonas fluorescens	64	32	≤0.125	0.5	2	256	8	1	4/76	0.5	>256	>256	>256	128	>256
149-1	Pseudomonas fragi	8	8	≤0.125	0.25	1	32	≤0.125	1	4/76	4	64	>256	>256	8	>256
149-2	Pseudomonas fluorescens	8	8	≤0.125	0.25	1	8	≤0.125	1	8/152	2	64	>256	>256	8	256
150-2	Pseudomonas fragi	16	8	≤0.125	0.25	0.5	32	≤0.125	1	4/76	1	64	>256	256	8	>256
151-1	Pseudomonas psychrophila	8	8	≤0.125	0.5	1	32	≤0.125	1	4/76	1	64	>256	>256	4	>256
151-5	Pseudomonas lurida	32	32	1	2	32	>256	16	8	8/152	0.5	>256	>256	>256	128	>256
152-2	Pseudomonas fluorescens	8	8	≤0.125	0.25	1	0.5	≤0.125	1	4/76	2	64	>256	>256	4	>256
152-3	Pseudomonas fluorescens	64	16	≤0.125	0.25	2	>256	2	1	2/38	1	>256	>256	>256	64	>256
154-1	Pseudomonas fluorescens	64	32	≤0.125	0.25	1	>256	8	1	4/76	0.5	>256	>256	>256	128	>256
160-4	Pseudomonas deceptionensis	32	32	≤0.125	0.25	1	64	≤0.125	2	8/152	0.5	>256	>256	>256	32	>256
161-1	Pseudomonas azotoformans	8	2	≤0.125	≤0.125	2	64	≤0.125	0.5	＜1/19	0.5	64	>256	>256	4	>256
162-2	Pseudomonas fluorescens	64	32	≤0.125	0.25	2	>256	32	1	8/152	1	>256	>256	>256	128	>256
164-2	Pseudomonas fluorescens	32	32	≤0.125	0.25	2	256	16	1	4/76	0.5	>256	>256	>256	64	>256
165-4	Pseudomonas cedrina	32	32	≤0.125	0.25	1	>256	16	0.5	4/76	0.5	>256	>256	>256	64	>256
171-2	Pseudomonas fluorescens	64	32	≤0.125	0.25	1	256	2	1	2/38	4	>256	256	>256	64	>256
172-2	Pseudomonas fluorescens	8	16	≤0.125	0.25	1	32	≤0.125	1	8/152	2	64	>256	256	8	>256
173-1	Pseudomonas fragi	32	64	≤0.125	0.5	1	32	2	2	8/152	1	128	>256	>256	16	>256
181-4	Pseudomonas fluorescens	32	16	≤0.125	0.25	2	256	16	1	2/38	1	>256	>256	>256	128	>256
183-1	Pseudomonas fluorescens	8	8	≤0.125	0.25	1	64	0.25	1	4/76	1	64	>256	256	4	>256
183-3	Pseudomonas fragi	16	4	≤0.125	0.25	0.5	64	2	0.5	4/76	1	256	256	>256	64	>256
191-2	Pseudomonas cedrina	128	64	0.25	1	2	>256	16	2	2/38	8	>256	>256	>256	128	>256
198-5	Pseudomonas psychrophila	32	8	≤0.125	0.25	1	>256	8	0.5	2/38	0.5	>256	>256	>256	64	>256
200-1	Pseudomonas psychrophila	8	32	≤0.125	0.5	1	32	≤0.125	2	2/38	4	64	>256	>256	4	>256
200-2	Pseudomonas fluorescens	32	32	≤0.125	0.25	1	>256	16	1	2/38	0.5	>256	>256	>256	64	>256
