# Supplementary material for: Antibiotic Resistance Patterns of Pseudomonas spp. Isolated From Raw Milk Revealed by Whole Genome Sequencing
Source: Front Microbiol. 2020 Jun 3;11:1005. doi: 10.3389/fmicb.2020.01005 (PMC7326020; doi:10.3389/fmicb.2020.01005)
Supplement: Supplementary file 2 [file Table_2.XLSX]

## Sheet: 10 antibiotics
Supplementary Table S2: Multiple Antibiotic Resistance (MAR) Index of Pseudomonas spp.
Isolate	MAR Index	Antibiotics
8-2	0.4	ATM, C, IPM, MEM
9-3	0.1	ATM
9-4	0.4	ATM, C, IPM, PB
10-3	0.4	ATM, C, IPM, SXT
11-2	0.4	ATM, C, IPM, SXT
13-3	0.3	ATM, C, IPM
18-4	0.4	ATM, C, IPM, SXT
19-2	0.4	ATM, IPM, PB, SXT
22-4	0.5	ATM, C, IPM, MEM, SXT
39-1	0.1	IPM
43-3	0.4	ATM, C, IPM, SXT
57-2	0.2	ATM, IPM
59-3	0.3	ATM, IPM, SXT
62-2	0.3	ATM, C, SXT
65-1	0.2	ATM, IPM
68-1	0.8	ATM, C, GM, IPM,MEM, PB, TE, SXT
70-3	0.2	IPM, SXT
72-5	0.2	IPM, SXT
73-1	0.2	ATM, IPM
73-2	0.2	IPM, SXT
74-4	0.3	ATM, IPM, SXT
75-3	0.4	ATM, IPM, MEM, SXT
77-1	0.2	IPM, SXT
78-2	0.1	IPM
79-2	0.1	IPM
80-2	0.3	ATM, IPM, SXT
81-1	0.4	ATM, C, IPM, SXT
84-3	0.4	ATM, IPM, MEM, SXT
84-7	0.3	ATM, IPM, SXT
86-4	0.3	ATM, IPM, SXT
87-1	0.5	ATM, C, IPM, MEM, SXT
87-2	0.2	IPM, SXT
88-1	0.5	ATM, C, IPM, PB, SXT
90-3	0.5	ATM, C, IPM, MEM, SXT
91-2	0.4	ATM, C, IPM, SXT
93-4	0.5	ATM, C, IPM, MEM, SXT
95-1	0.3	ATM, IPM, SXT
97-1	0.3	ATM, IPM, SXT
97-2	0.3	ATM, IPM, SXT
99-2	0.3	ATM, IPM, PB
99-4	0.3	ATM, IPM, MEM
103-1	0.8	ATM, C, CIP, IPM, MEM, LVX, TE, SXT
103-3	0.7	ATM, C, CIP, IPM, MEM, TE, SXT
106-3	0.5	ATM, C, IPM, PB, SXT
108-3	0.2	IPM, SXT
109-1	0.4	ATM, IPM, MEM, PB
109-3	0.1	IPM
112-5	0.4	ATM, C, IPM, SXT
114-2	0.6	ATM, C, GM, IPM, TE, SXT
117-1	0.2	IPM, SXT
118-3	0.5	ATM, C, IPM, MEM, SXT
120-1	0.2	ATM, IPM
120-4	0.3	ATM, IPM, SXT
127-2	0.3	ATM, IPM, SXT
127-3	0.6	ATM, C, CIP, IPM, MEM, SXT
129-3	0.4	ATM, C, IPM, MEM
131-1	0.3	ATM, IPM, MEM
136-3	0.1	IPM
137-1	0.5	ATM, C, GM, IPM, SXT
137-2	0.4	ATM, C, IPM, SXT
139-4	0.4	ATM, IPM, PB, SXT
141-6	0.6	ATM, C, CIP, IPM, MEM, SXT
143-2	0.4	ATM, C, IPM, SXT
149-1	0.2	IPM, SXT
149-2	0.1	SXT
150-2	0.3	ATM, IPM, SXT
151-1	0.2	IPM, SXT
151-5	0.7	ATM, C, CIP, GM, IPM, MEM, SXT
152-2	0.1	SXT
152-3	0.2	ATM, IPM
154-1	0.4	ATM, C, IPM, SXT
160-4	0.4	ATM, C, IPM, SXT
161-1	0.2	IPM, SXT
162-2	0.5	ATM, C, IPM, MEM, SXT
164-2	0.5	ATM, C, IPM, MEM, SXT
165-4	0.5	ATM, C, IPM, MEM, SXT
171-2	0.3	ATM, C, IPM,
172-2	0.2	IPM, SXT
173-1	0.4	ATM, C, IPM, SXT
181-4	0.3	ATM, IPM, MEM
183-1	0.2	IPM, SXT
183-3	0.3	ATM, IPM, SXT
191-2	0.5	ATM, C, IPM, MEM, PB
198-5	0.2	ATM, IPM
200-1	0.2	C, IPM
200-2	0.4	ATM, C, IPM, MEM
